# Supplementary material for: Metabolic Aberrations Impact Biophysical Integrity of Macromolecular Protein Pools in the Default Mode Network
Source: Oxford University Press journal article supplement (doi:10.2337/db15-1714), 2016-08-19

SUPPLEMENTARY DATA

**Supplementary Figure S1.** Anatomically defined regions of interest (ROIs) of posterior cingulate cortex (PCC) and precuneus (PCu) within the default mode network (DMN) mask ( $P < 0.0001$ ).

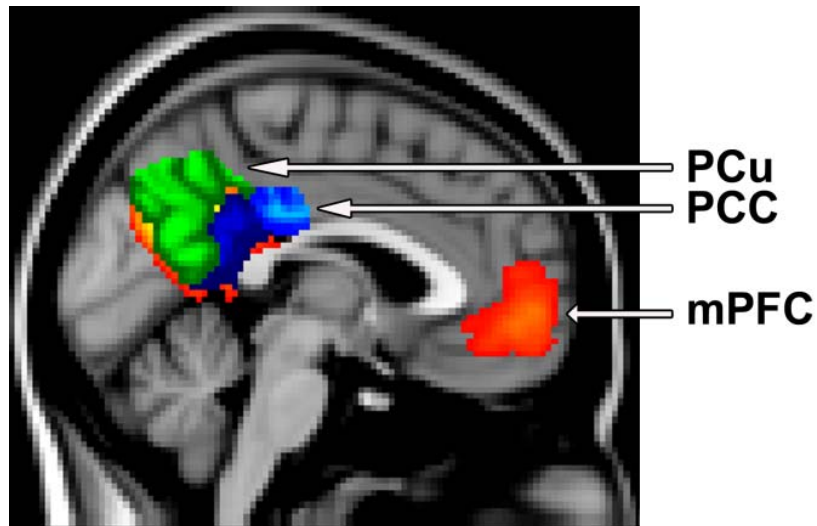

SUPPLEMENTARY DATA

**Supplementary Figure S2.** Biophysical integrity of macromolecular protein pools, measured by magnetization transfer ratio (MTR), in the posterior cingulate cortex (PCC), a central hub region of the default mode network (DMN), within the DMN mask (at a reduced threshold  $P < 0.05$ ) on 21 patients with type 2 diabetes mellitus (T2DM) and 27 matched healthy control subjects (HCs). **(a)** Mixed model analysis (with diagnostic group as the between-group factor and hemisphere as a within-subject factor) of MTR in the white matter (WM) portion of the PCC of the DMN ( $F = 9.462$ ,  $df = 1,46$ ,  $P = 0.004$ ). **(b)** Mixed model analysis of MTR in the gray matter (GM) portion of the PCC of the DMN ( $F = 3.789$ ,  $df = 1,46$ ,  $P = 0.058$ ). Individual data points are displayed with the big red points representing the group means.

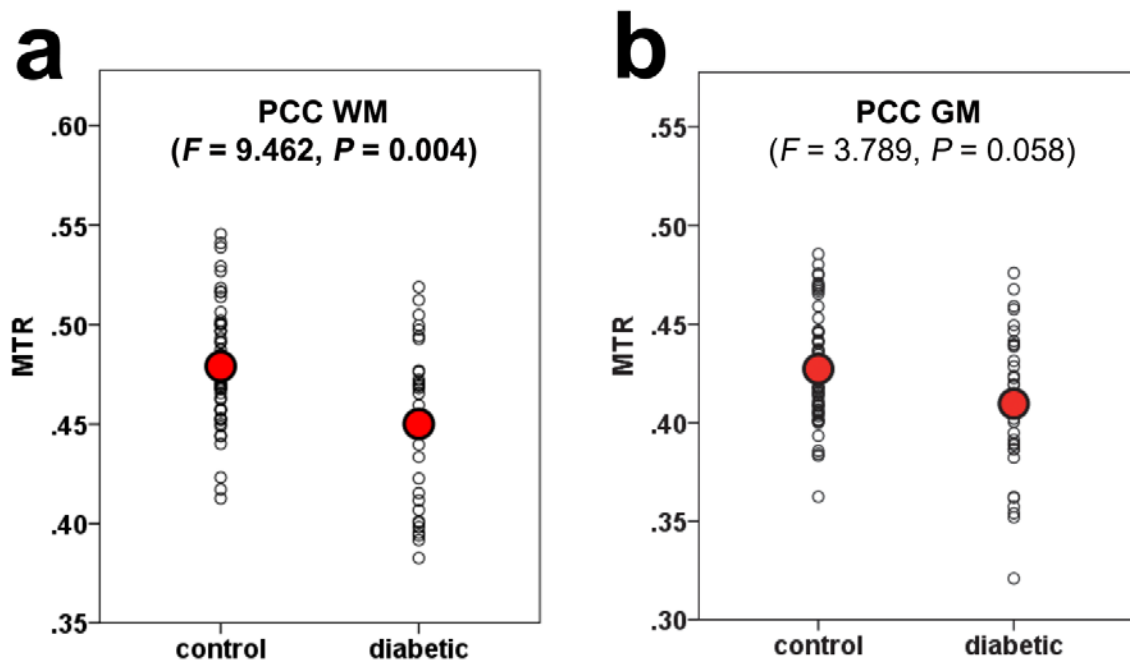

Supplement: db151714supplementarydata.pdf [file db151714supplementarydata.pdf]
